# Supplementary material
Source: Springer Nature journal article supplement (https://www.springermedizin.de/resource/supplementary/12889_2011_3803_MOESM1_ESM.PDF/9492606)
Supplement: MOESM1 [file 9492606]

## Additional files

### Additional file 1 – Frailty Instruments: Overview of all items

#### The Groningen Frailty Indicator (GFI)

|                                                                                                                                                                                               | 0 | 1 |
|-----------------------------------------------------------------------------------------------------------------------------------------------------------------------------------------------|---|---|
| <b>Physical components</b>                                                                                                                                                                    |   |   |
| Are you able to carry out these tasks single-handedly and without any help? (The use of help resources such as a walking stick, walking frame or wheelchair is considered to be independent.) |   |   |
| 1. Shopping                                                                                                                                                                                   |   |   |
| 2. Walking around outside (around the house or to the neighbours)                                                                                                                             |   |   |
| 3. Dressing and undressing                                                                                                                                                                    |   |   |
| 4. Going to the toilet                                                                                                                                                                        |   |   |
| 5. What mark do you give yourself for physical fitness? (scale 0 to 10)                                                                                                                       |   |   |
| 6. Do you experience problems in daily life due to poor vision?                                                                                                                               |   |   |
| 7. Do you experience problems in daily life due to being hard of hearing?                                                                                                                     |   |   |
| 8. During the last 6 months have you lost a lot of weight unwillingly?<br>(3 kg in 1 month or 6 kg in 2 months)                                                                               |   |   |
| 9. Do you take 4 or more different types of medicine?                                                                                                                                         |   |   |
| <b>Cognitive component</b>                                                                                                                                                                    |   |   |
| 10. Do you have any complaints about your memory?                                                                                                                                             |   |   |
| <b>Social component</b>                                                                                                                                                                       |   |   |
| 11. Do you sometimes experience emptiness around yourself?                                                                                                                                    |   |   |
| 12. Do you sometimes miss people around yourself?                                                                                                                                             |   |   |
| 13. Do you sometimes feel abandoned?                                                                                                                                                          |   |   |
| <b>Psychological component</b>                                                                                                                                                                |   |   |
| 14. Have you recently felt downhearted or sad?                                                                                                                                                |   |   |
| 15. Have you recently felt nervous or anxious?                                                                                                                                                |   |   |
| <b>Scoring:</b>                                                                                                                                                                               |   |   |
| Questions 1-4: Yes = 0; No = 1                                                                                                                                                                |   |   |
| Question 5: 0-6 = 1; 7-10 = 0                                                                                                                                                                 |   |   |
| Questions 6-9: No = 0; Yes = 1                                                                                                                                                                |   |   |
| Question 10: No = 0; Sometimes = 0; Yes = 1                                                                                                                                                   |   |   |
| Questions 11-15: No = 0; Sometimes = 1; Yes = 1                                                                                                                                               |   |   |

### The Tilburg Frailty Indicator (TFI) (2nd subscale)

|                                                                                                                                                                    | 0 | 1 |
|--------------------------------------------------------------------------------------------------------------------------------------------------------------------|---|---|
| <b>Physical component</b>                                                                                                                                          |   |   |
| 1. Do you feel healthy?                                                                                                                                            |   |   |
| 2. Have you lost a lot of weight recently without wishing to do so?<br>(‘A lot’ is 6 kg or more during the last six months or 3 kg or more during the last month.) |   |   |
| Do you experience problems in your daily life due to:                                                                                                              |   |   |
| 3. Difficulty in walking?                                                                                                                                          |   |   |
| 4. Difficulty with maintaining your balance?                                                                                                                       |   |   |
| 5. Poor hearing?                                                                                                                                                   |   |   |
| 6. Poor vision?                                                                                                                                                    |   |   |
| 7. Lack of strength in your hands?                                                                                                                                 |   |   |
| 8. Physical tiredness?                                                                                                                                             |   |   |
| <b>Psychological component</b>                                                                                                                                     |   |   |
| 9. Do you have problems with your memory?                                                                                                                          |   |   |
| 10. Have you felt down during the last month?                                                                                                                      |   |   |
| 11. Have you felt nervous or anxious during the last month?                                                                                                        |   |   |
| 12. Are you able to cope with problems well?                                                                                                                       |   |   |
| <b>Social component</b>                                                                                                                                            |   |   |
| 13. Do you live alone?                                                                                                                                             |   |   |
| 14. Do you sometimes wish you had more people around you?                                                                                                          |   |   |
| 15. Do you receive enough support from other people?                                                                                                               |   |   |
| <b>Scoring:</b>                                                                                                                                                    |   |   |
| Question 1: Yes = 0; No = 1                                                                                                                                        |   |   |
| Questions 2-8: No = 0; Yes = 1                                                                                                                                     |   |   |
| Question 9: No = 0; Sometimes = 0; Yes = 1                                                                                                                         |   |   |
| Questions 10-11: No = 0; Sometimes = 1; Yes = 1                                                                                                                    |   |   |
| Question 12: No = 1; Yes = 0                                                                                                                                       |   |   |
| Question 13: No = 0; Yes = 1                                                                                                                                       |   |   |
| Question 14: No = 0; Sometimes = 1; Yes = 1                                                                                                                        |   |   |
| Question 15: Yes = 0; No = 1                                                                                                                                       |   |   |

### The Sherbrooke Postal Questionnaire (SPQ)

---

|                                                                         |   |   |
|-------------------------------------------------------------------------|---|---|
|                                                                         | 0 | 1 |
| 1. Do you live alone?                                                   |   |   |
| 2. Do you take more than three different medications every day?         |   |   |
| 3. Do you regularly use a cane, a walker or a wheelchair to move about? |   |   |
| 4. Do you see well?                                                     |   |   |
| 5. Do you hear well?                                                    |   |   |
| 6. Do you have problems with your memory?                               |   |   |
| <b>Scoring:</b>                                                         |   |   |
| Question 1: Yes = 0; No = 1                                             |   |   |
| Questions 2-3: No = 0; Yes = 1                                          |   |   |
| Questions 4-5: Yes = 0; No = 1                                          |   |   |
| Question 6: No = 0; Yes = 1                                             |   |   |

---
